# Supplementary material
Source: HighWire-hosted journal article supplement (https://ijgc.bmj.com/content/33/2/137)
Supplement: inline-supplementary-material-1 [file inline-supplementary-material-1.pdf]

Supplemental Table 1. Surgical procedures in overall population

| Variables                         | All patients<br>n (%) | Group 1<br>MI-SCS<br>n (%) | Group 2<br>LPT-SCS<br>n (%) | p-value <sup>a</sup> |
|-----------------------------------|-----------------------|----------------------------|-----------------------------|----------------------|
| <b>All cases</b>                  | 276                   | 62                         | 214                         |                      |
| <b>Peritonectomy</b>              | 156 (56.5)            | 24 (38.7)                  | 132 (61.7)                  | <b>0.001</b>         |
| <b>Lymphadenectomy</b>            | 167 (60.5)            | 37 (59.7)                  | 130 (60.7)                  | 0.496                |
| <b>Systematic lymphadenectomy</b> |                       |                            |                             | 0.816                |
| Pelvic                            | 36 (13.0)             | 10 (16.1)                  | 26 (12.1)                   |                      |
| Aortic                            | 36 (13.0)             | 7 (11.3)                   | 29 (13.6)                   |                      |
| Pelvic & Aortic                   | 31 (11.2)             | 5 (8.1)                    | 26 (12.1)                   |                      |
| Mixed                             | 5 (1.8)               | 1 (1.6)                    | 4 (1.9)                     |                      |
| <b>Bulky lymph-node</b>           |                       |                            |                             | 0.076                |
| Pelvic                            | 57 (20.7)             | 20 (32.3)                  | 37 (17.3)                   |                      |
| Aortic                            | 62 (22.5)             | 9 (14.5)                   | 53 (24.8)                   |                      |
| Pelvic & Aortic                   | 32 (11.6)             | 5 (8.1)                    | 27 (12.6)                   |                      |
| Mixed                             | 16 (5.8)              | 3 (4.8)                    | 13 (6.1)                    |                      |
| <b>Splenectomy</b>                | 30 (10.9)             | 3 (4.8)                    | 27 (12.6)                   | 0.059                |
| <b>Liver resection</b>            | 14 (5.1)              | 2 (3.2)                    | 12 (5.6)                    | 0.355                |
| <b>Bowel resection</b>            |                       |                            |                             | <b>&lt;0.001</b>     |
| Small bowel                       | 3 (1.1)               | 0                          | 3 (1.4)                     |                      |
| Large bowel/rectum                | 48 (17.4)             | 1 (1.6)                    | 47 (22.0)                   |                      |
| Both                              | 17 (6.2)              | 0                          | 17 (7.9)                    |                      |
| <b>Aletti score at SCS</b>        |                       |                            |                             | <b>&lt;0.001</b>     |
| 1                                 | 181 (65.6)            | 61 (98.4)                  | 120 (56.1)                  |                      |
| 2                                 | 78 (28.3)             | 1 (1.6)                    | 77 (36.0)                   |                      |
| 3                                 | 17 (6.2)              | 0                          | 17 (7.9)                    |                      |
| <b>RT at SCS</b>                  |                       |                            |                             | <b>0.026</b>         |
| 0                                 | 262 (94.9)            | 62 (100.0)                 | 200 (93.5)                  |                      |
| > 0                               | 14 (5.1)              | 0                          | 14 (6.5)                    |                      |

<sup>a</sup>*Calculated using the Chi square test or the Fisher's exact test.*

Abbreviations: MI-SCS: minimally invasive secondary cytoreduction surgery; LPT-SCS: laparotomic secondary cytoreduction surgery; SCS= secondary cytoreduction surgery; RT= residual tumour.
